# Supplementary material for: Discrimination of Black and White Sesame Seeds Based on Targeted and Non-Targeted Platforms with Chemometrics: From Profiling towards Identification of Chemical Markers
Source: MDPI journal article supplement (doi:10.3390/foods11142042), 2022-07-11
Supplement: s1 [file s1]

**Supplementary Table S1**

Information of individual fatty acid methyl esters quantified in the black and white sesame seeds.

| No. | Fatty acid methyl esters     | Symbols | Calibration curves      | R <sup>2</sup> value | Linear dynamic range (µg/mL) |
|-----|------------------------------|---------|-------------------------|----------------------|------------------------------|
| 1   | Methyl butyrate              | C4:0    | $y = 0.68x + 0.01$      | 0.9996               | 0.002 - 50                   |
| 2   | Methyl hexanoate             | C6:0    | $y = 2.15x + 2.40E-004$ | 0.9997               | 0.002 - 50                   |
| 3   | Methyl octanoate             | C8:0    | $y = 2.81x + 3.55E-004$ | 0.9997               | 0.002 - 50                   |
| 4   | Methyl decanoate             | C10:0   | $y = 2.97x + 4.41E-004$ | 0.9997               | 0.004 - 100                  |
| 5   | Methyl undecanoate           | C11:0   | $y = 2.94x + 3.13E-004$ | 0.9998               | 0.002 - 50                   |
| 6   | Methyl dodecanoate           | C12:0   | $y = 2.92x + 3.92E-004$ | 0.9998               | 0.004 - 100                  |
| 7   | Methyl tridecanoate          | C13:0   | $y = 2.77x + 3.06E-004$ | 0.9997               | 0.002 - 50                   |
| 8   | Methyl myristate             | C14:0   | $y = 2.58x + 0.015441$  | 0.9996               | 0.002 - 50                   |
| 9   | Methyl myristoleate          | C14:1n5 | $y = 1.09x - 6.42E-004$ | 0.9993               | 0.002 - 50                   |
| 10  | Methyl pentadecanoate        | C15:0   | $y = 2.53x + 1.38E-004$ | 0.9997               | 0.002 - 50                   |
| 11  | Methyl cis-10-pentadecenoate | C15:1n5 | $y = 0.98x + 1.15E-004$ | 0.9998               | 0.002 - 50                   |

|    |                                           |          |                         |        |             |
|----|-------------------------------------------|----------|-------------------------|--------|-------------|
| 12 | Methyl palmitate                          | C16:0    | $y = 2.54x + 0.07$      | 0.9997 | 0.004 - 100 |
| 13 | Methyl palmitoleate                       | C16:1n7  | $y = 0.77x + 0.01$      | 0.9997 | 0.002 - 50  |
| 14 | Methyl heptadecanoate                     | C17:0    | $y = 2.40x - 8.81E-004$ | 0.9997 | 0.004 - 100 |
| 15 | Methyl cis-10-heptadecenoate              | C17:1n7  | $y = 0.75x + 1.37E-004$ | 0.9997 | 0.002 - 50  |
| 16 | Methyl stearate                           | C18:0    | $y = 2.44x + 0.08$      | 0.9996 | 0.004 - 100 |
| 17 | Methyl elaidate                           | C18:1n9t | $y = 0.78x - 0.004$     | 0.9996 | 0.002 - 50  |
| 18 | Methyl oleate                             | C18:1n9  | $y = 0.72x + 0.10$      | 0.9995 | 0.004 - 100 |
| 19 | Methyl linolelaidate                      | C18:2n6t | $y = 0.96x - 0.02$      | 0.9996 | 0.002 - 50  |
| 20 | Methyl linoleate                          | C18:2n6  | $y = 0.96x - 0.03$      | 0.9996 | 0.002 - 50  |
| 21 | Methyl $\gamma$ -linolenate               | C18:3n6  | $y = 0.78x + 3.12E-004$ | 0.9999 | 0.004 - 100 |
| 22 | Methyl linolenate                         | C18:3n3  | $y = 1.05x - 0.004$     | 0.9998 | 0.002 - 50  |
| 23 | Methyl arachidate                         | C20:0    | $y = 1.87x + 1.53E-004$ | 0.9998 | 0.004 - 100 |
| 24 | cis-11-Eicosenoic acid methyl ester       | C20:1n9  | $y = 0.83x - 0.01$      | 0.9999 | 0.002 - 50  |
| 25 | cis-11,14-Eicosadienoic acid methyl ester | C20:2n6  | $y = 0.91x - 0.02$      | 0.9995 | 0.002 - 50  |

|    |                                                     |         |                         |        |             |
|----|-----------------------------------------------------|---------|-------------------------|--------|-------------|
| 26 | Methyl heneicosanoate                               | C21:0   | $y = 1.55x + 0.001$     | 0.9999 | 0.002 - 50  |
| 27 | cis-8,11,14-Eicosatrienoic acid methyl ester        | C20:3n6 | $y = 0.88x - 0.03$      | 0.9995 | 0.002 - 50  |
| 28 | Methyl arachidonate                                 | C20:4n6 | $y = 0.95x - 0.05$      | 0.9995 | 0.002 - 50  |
| 29 | cis-11,14,17-Eicosatrienoic acid methyl ester       | C20:3n3 | $y = 1.12x - 0.06$      | 0.9995 | 0.002 - 50  |
| 30 | Methyl behenate                                     | C22:0   | $y = 1.60x - 2.48E-004$ | 0.9995 | 0.004 - 100 |
| 31 | cis-5,8,11,14,17-Eicosapentaenoic acid methyl ester | C20:5n3 | $y = 1.08x - 0.01$      | 0.9999 | 0.002 - 50  |
| 32 | Methyl erucate                                      | C22:1n9 | $y = 0.94x - 0.01$      | 0.9999 | 0.002 - 50  |
| 33 | cis-13,16-Docosadienoic acid methyl ester           | C22:2n6 | $y = 0.55x + 3.97E-005$ | 0.9994 | 0.002 - 50  |
| 34 | Methyl tricosanoate                                 | C23:0   | $y = 1.88x - 0.01$      | 0.9999 | 0.002 - 50  |
| 35 | Methyl docosatetraenoate                            | C22:4n6 | $y = 1.01x - 0.03$      | 0.9992 | 0.002 - 50  |
| 36 | Methyl docosapentaenoate                            | C22:5n6 | $y = 1.02x - 0.03$      | 0.9992 | 0.002 - 50  |
| 37 | Methyl tetracosanoate                               | C24:0   | $y = 1.79x - 0.02$      | 0.9998 | 0.004 - 100 |
| 38 | Methyl docosapentaenoate                            | C22:5n3 | $y = 1.03x - 0.04$      | 0.9999 | 0.002 - 50  |
| 39 | Methyl cis-15-tetracosenoate                        | C24:1n9 | $y = 1.04x - 0.05$      | 0.9997 | 0.002 - 50  |

40 cis-4,7,10,13,16,19-Docosahexaenoic acid methyl ester C22:6n3  $y = 1.10x - 0.07$  0.9995 0.002 - 50

## Supplementary Table S2

Summary of differential metabolites between black and white sesame seeds.

| No. | Compounds                               | Adduct ions                             | <i>m/z</i> | RT (min) | Fold change (BS/WS) | <i>p</i> value | VIP   |
|-----|-----------------------------------------|-----------------------------------------|------------|----------|---------------------|----------------|-------|
| 1   | Glycerophosphocholine                   | M <sup>+</sup>                          | 258.1103   | 7.08     | 0.41                | < 0.01         | 4.41  |
| 2   | Trigonelline                            | M <sup>+</sup>                          | 138.0539   | 4.92     | 0.19                | < 0.01         | 10.00 |
| 3   | D-Proline                               | [M+H] <sup>+</sup>                      | 116.0694   | 5.20     | 0.39                | < 0.01         | 2.41  |
| 4   | Baicalin                                | [M+H-H <sub>2</sub> O] <sup>+</sup>     | 411.0689   | 0.50     | 29.69               | < 0.01         | 1.78  |
| 5   | Xanthine                                | [M+H] <sup>+</sup>                      | 153.0392   | 5.16     | 0.49                | < 0.01         | 1.07  |
| 6   | Adenosine monophosphate                 | [M+H] <sup>+</sup>                      | 348.0687   | 7.20     | 2.14                | < 0.01         | 2.82  |
| 7   | Famciclovir                             | [M+H] <sup>+</sup>                      | 360.1031   | 2.74     | 3.61                | < 0.01         | 1.06  |
| 8   | 3-Hydroxy-4-methoxycinnamic acid        | [M+H-H <sub>2</sub> O] <sup>+</sup>     | 177.0531   | 2.29     | 0.35                | < 0.01         | 2.59  |
| 9   | Nicotinyl                               | [M+H] <sup>+</sup>                      | 110.0586   | 0.85     | 0.26                | < 0.01         | 1.11  |
| 10  | 2,5-Dihydroxycinnamic acid methyl ester | [M+CH <sub>3</sub> COO+2H] <sup>+</sup> | 255.0840   | 0.97     | 0.48                | < 0.01         | 1.17  |
| 11  | Anthranilic acid                        | [M+H] <sup>+</sup>                      | 138.0536   | 5.90     | 0.34                | < 0.01         | 1.74  |
| 12  | Pyridoxine                              | [M+H] <sup>+</sup>                      | 170.0794   | 1.80     | 0.34                | < 0.01         | 1.82  |
| 13  | 4-Hydroxyphenylpyruvate                 | [M+CH <sub>3</sub> COO+2H] <sup>+</sup> | 241.0687   | 0.69     | 0.45                | 0.01           | 1.27  |
| 14  | L-Arginine                              | [M+H] <sup>+</sup>                      | 175.1180   | 8.88     | 0.49                | 0.03           | 3.62  |
| 15  | Nicotine                                | [M+H] <sup>+</sup>                      | 163.1214   | 1.27     | 0.24                | 0.04           | 1.02  |
| 16  | Dimethylglycine                         | [M+H] <sup>+</sup>                      | 104.0695   | 4.25     | 0.21                | 0.04           | 1.58  |

|    |                                                        |                    |          |      |        |        |      |
|----|--------------------------------------------------------|--------------------|----------|------|--------|--------|------|
| 17 | L-Pyroglutamic acid                                    | [M-H] <sup>-</sup> | 128.0349 | 4.98 | 0.41   | < 0.01 | 2.50 |
| 18 | 1-Palmitoyl-2-hydroxy-sn-glycero-3-phosphoethanolamine | [M-H] <sup>-</sup> | 452.2783 | 3.32 | 0.45   | < 0.01 | 2.28 |
| 19 | 3-Hydroxy-3-methylglutaric acid                        | [M-H] <sup>-</sup> | 161.0447 | 6.15 | 2.01   | < 0.01 | 1.86 |
| 20 | β-Estradiol 3,17-disulfate                             | [M-H] <sup>-</sup> | 431.0798 | 0.40 | 305.57 | < 0.01 | 8.79 |
| 21 | UDP-N-acetylglucosamine                                | [M-H] <sup>-</sup> | 606.0753 | 7.12 | 9.09   | < 0.01 | 1.20 |
| 22 | 9-OxoODE                                               | [M-H] <sup>-</sup> | 293.2114 | 0.62 | 0.49   | < 0.01 | 1.34 |
| 23 | PGF3a                                                  | [M-H] <sup>-</sup> | 351.2165 | 1.91 | 0.34   | < 0.01 | 1.40 |
| 24 | Scytalone                                              | [M-H] <sup>-</sup> | 193.0502 | 2.55 | 0.26   | < 0.01 | 2.15 |
| 25 | 4-Pyridoxic acid                                       | [M-H] <sup>-</sup> | 182.0452 | 0.69 | 0.32   | < 0.01 | 1.10 |
| 26 | Lawsone                                                | [M-H] <sup>-</sup> | 173.0240 | 1.31 | 0.25   | < 0.01 | 2.28 |
| 27 | 1,2-Benzenedicarboxylic acid                           | [M-H] <sup>-</sup> | 165.0187 | 3.03 | 3.16   | < 0.01 | 1.39 |
| 28 | Vanillin                                               | [M-H] <sup>-</sup> | 151.0393 | 1.18 | 2.08   | 0.01   | 1.39 |

**Note:** Differential metabolites were selected using the criteria of a fold change either  $\geq 2$  or  $\leq 0.5$ ,  $p$  value  $\leq 0.05$  and VIP score  $\geq 1$ .  $m/z$ , mass to charge ratio; RT, retention time; BS, black sesame seeds; WS, white sesame seeds; VIP, variable importance in projection.
